# Supplementary material for: Characterizing the Cattle Gut Microbiome in Farms with a High and Low Prevalence of Shiga Toxin Producing Escherichia coli
Source: MDPI journal article supplement (doi:10.3390/microorganisms9081737), 2021-08-14
Supplement: s1 [file s1]

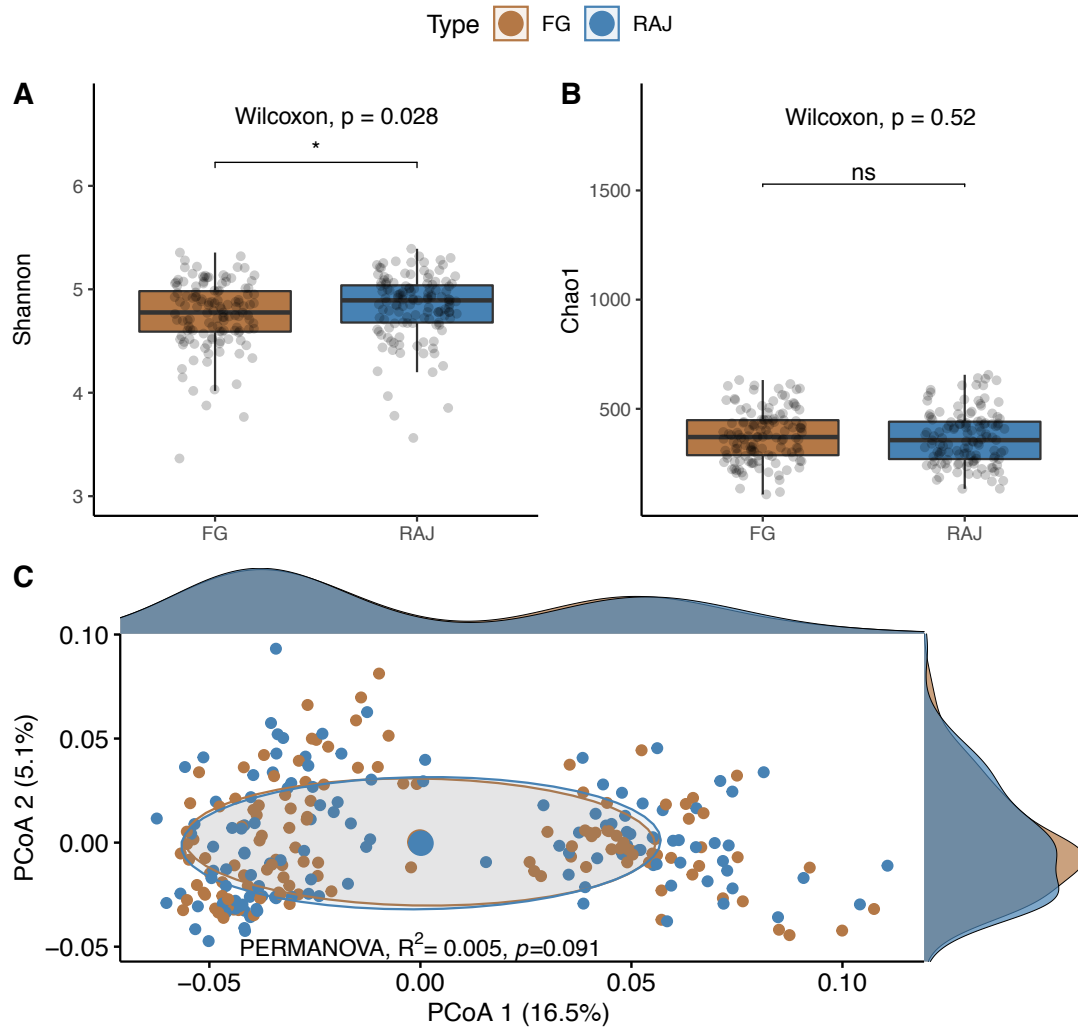

**Figure S1.** Paired comparison of fecal grab (FG) and recto-anal junction (RAJ) microbiome alpha and beta diversities. A) Shannon index boxplots. B) Chao1 index boxplots. C) Principal coordinate analysis of Weighted Unifrac ordination. The centroids of FG and RAJ distributions are shown with a bigger point size.

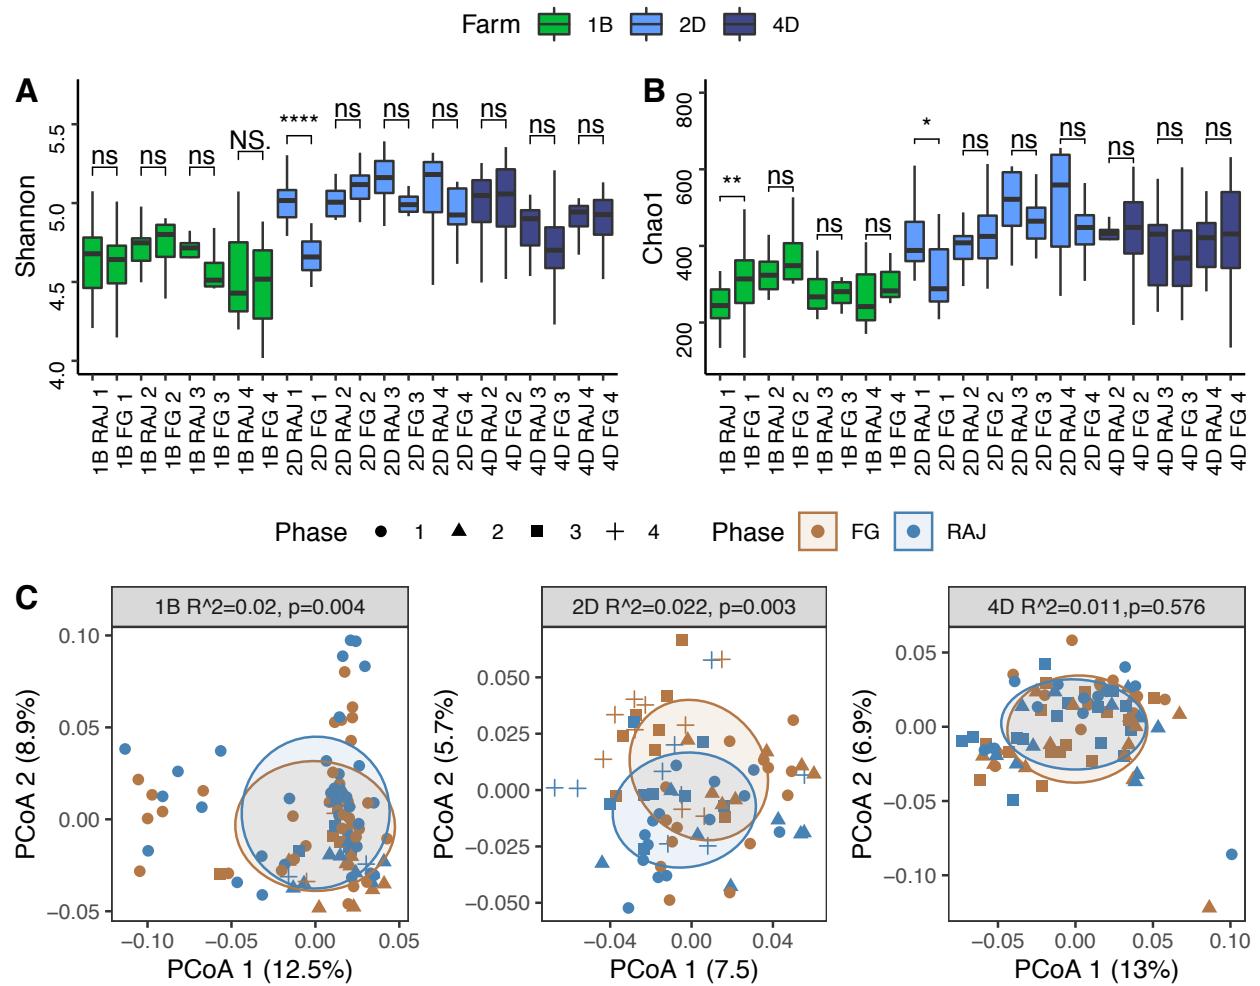

**Figure S2.** Paired comparison of fecal grab (FG) and recto-anal junction (RAJ) microbiome alpha and beta diversities per farm and sampling phase. The *p*-values in A and B were calculated with the Wilcoxon test and are represented with symbols “\*\*\*\*”  $\leq 0.0001$ , “\*”  $\leq 0.05$ , and “ns” not significant. A) Shannon index boxplots, B) Chao1 index boxplots. C) PCoA of Weighted Unifrac ordination; each box corresponds to a farm; the *R*<sup>2</sup> and *p*-value are from the PERMANOVA test between RAJ and FG.

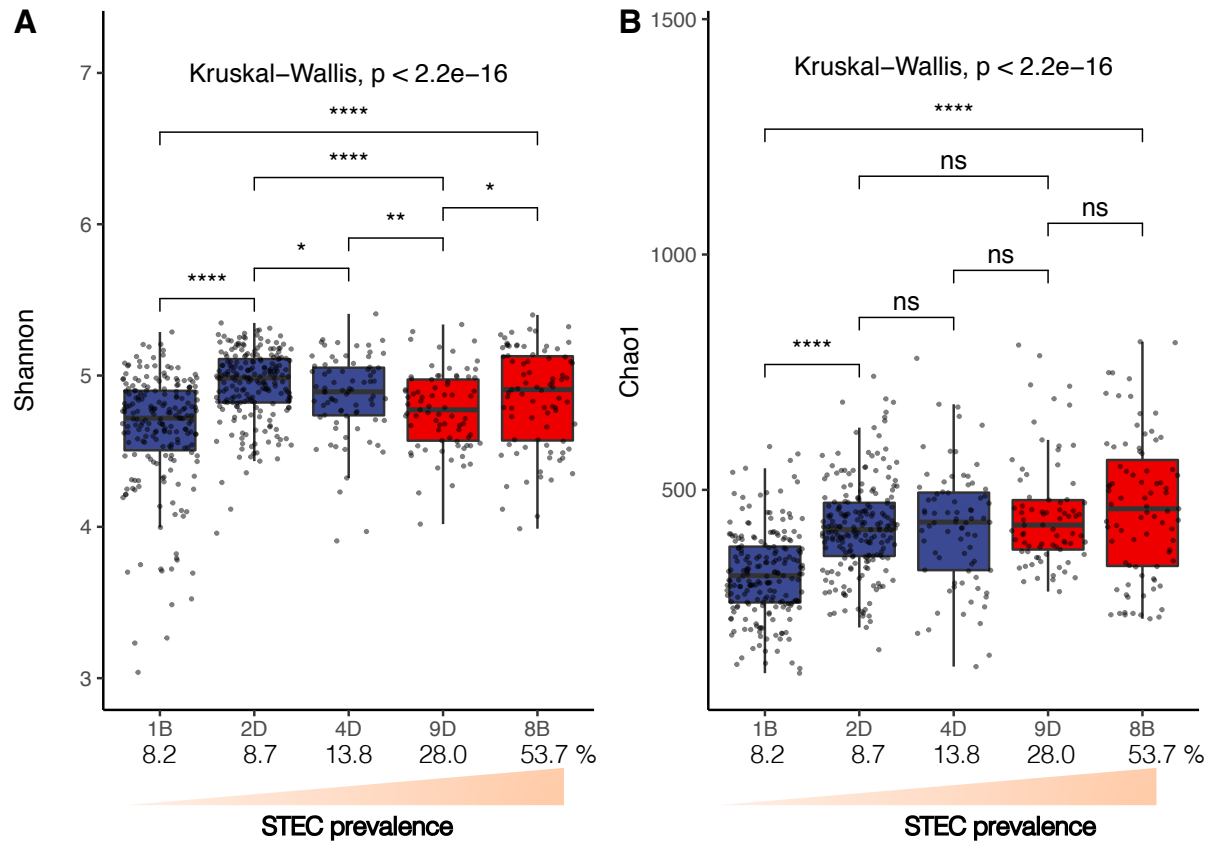

**Figure S3.** Cattle-hindgut microbiota alpha diversity among five farms. Farms classified as low STEC prevalence (LSP) are shown in blue, and farms with a high STEC prevalence (HSP) are in red. *p-value*: \*\*\*\*  $\leq 0.0001$ , \*\*\*  $\leq 0.001$ , \*\*  $\leq 0.01$ , ns not significant.

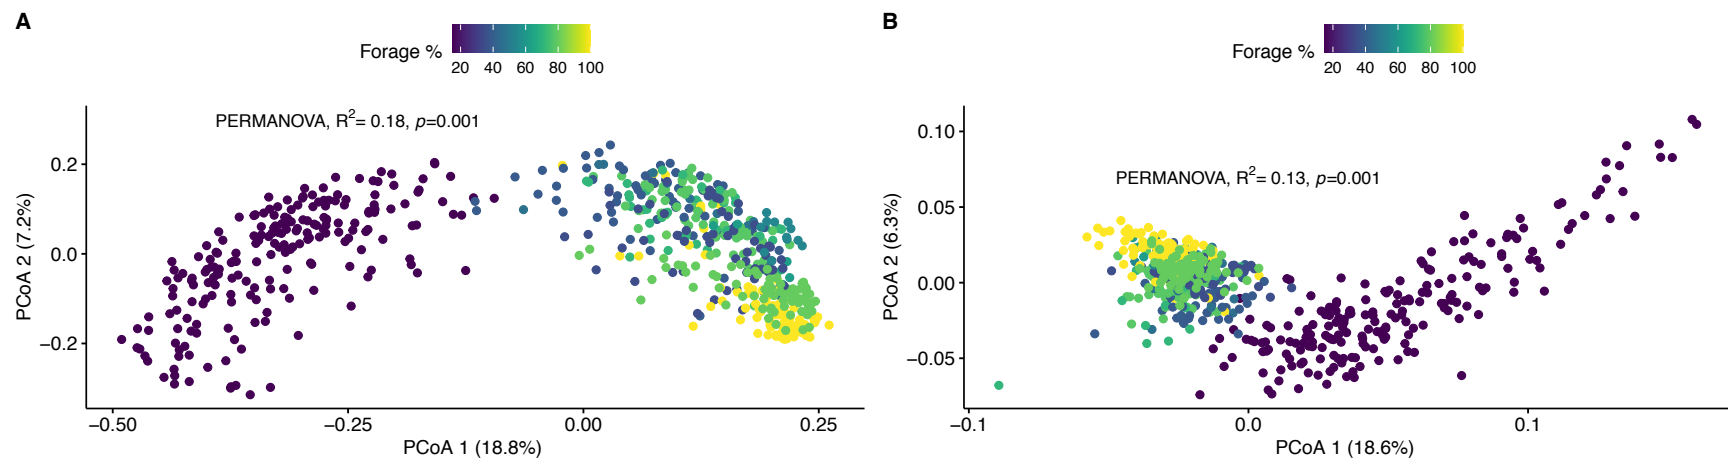

**Figure S4.** Principal coordinate analysis showing differences in the microbiome composition associated with the percentage of forage in diet. A) Bray-Curtis dissimilarity distances. B) Weighted Unifrac ordination.

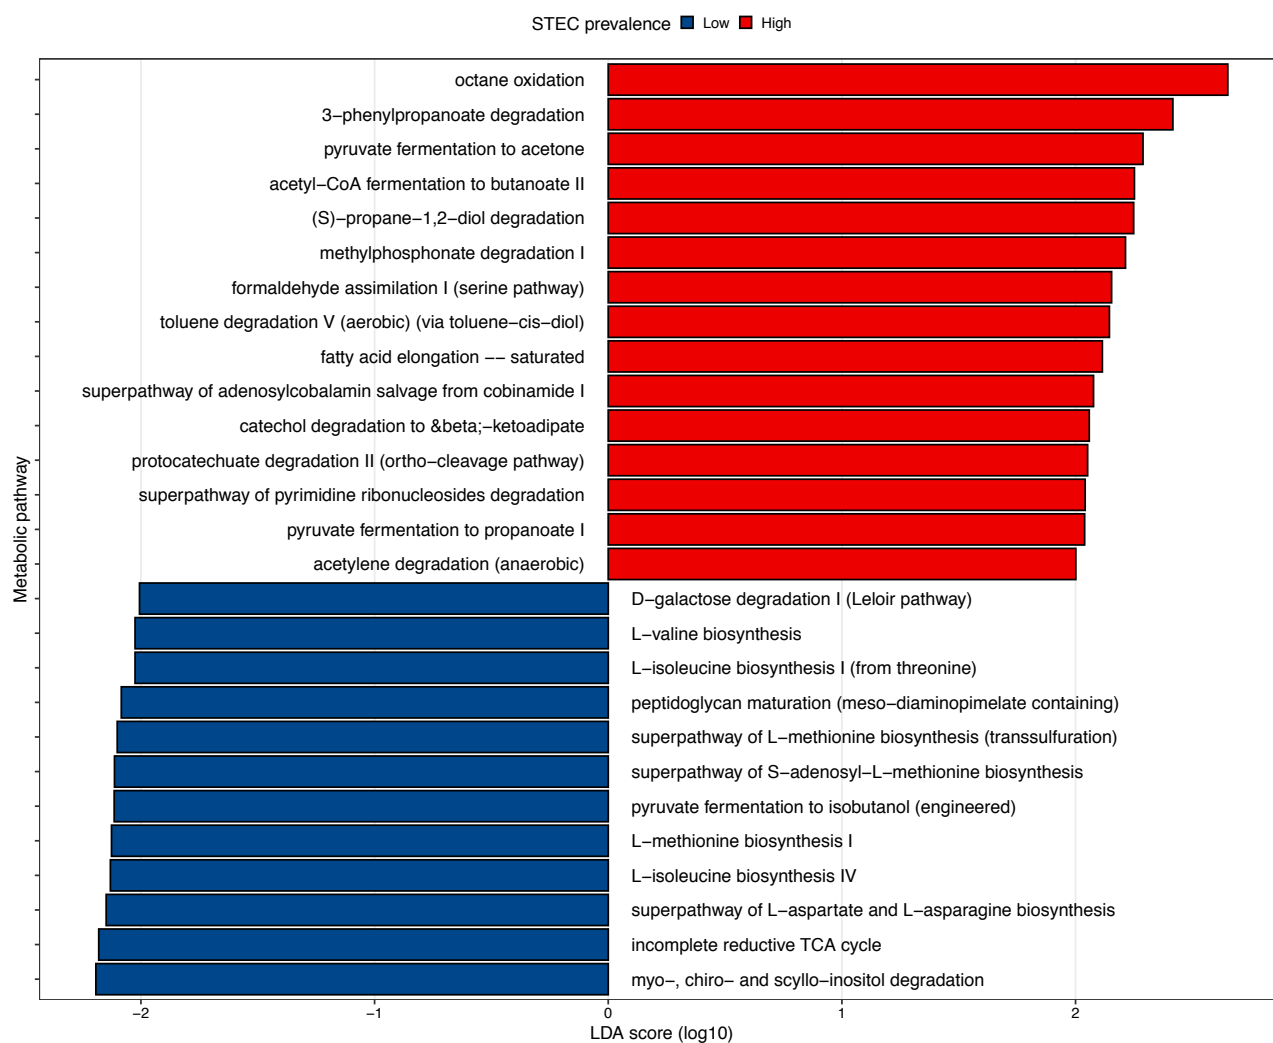

**Figure S5.** Linear discriminant effect sizes of metabolic pathways inferred from 16S *rRNA* sequences with PICRUSt2, between farms with low and high STEC prevalence. A total of 487 MetaCyc pathways were predicted from 16S *rRNA* sequences. LDA effect sizes of 5.5% of the pathways were significantly different between farms with a high and low STEC prevalence.

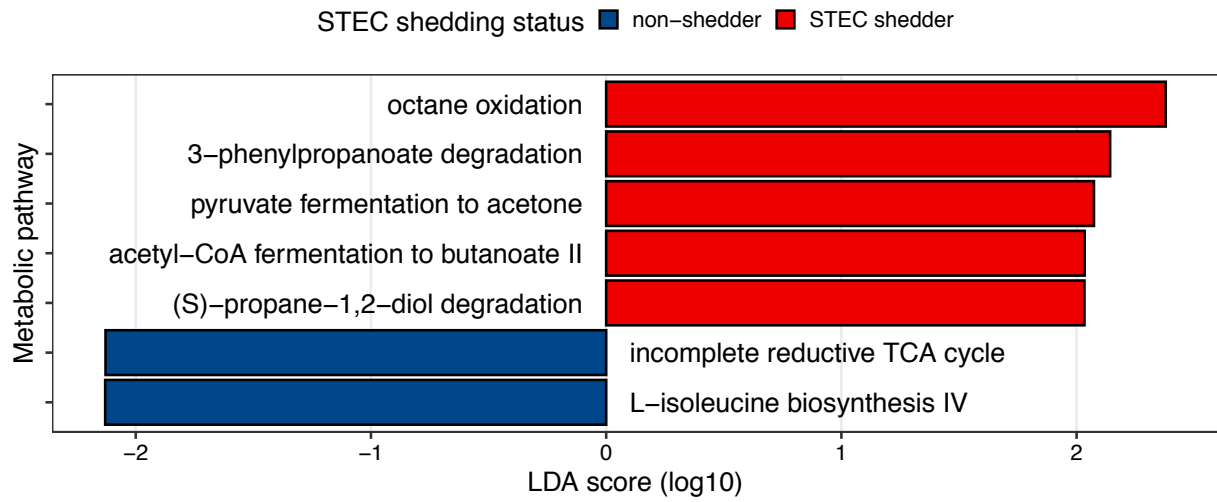

**Figure S6.** Linear discriminant effect sizes of metabolic pathways inferred from 16S *rRNA* sequences between STEC shedders and non-shedders.

**Table S1.** Number of animals sampled longitudinally per farm and number of days from each phase.

| Farm | No. Animals | Days (No.) |         |         |         |
|------|-------------|------------|---------|---------|---------|
|      |             | Phase 1    | Phase 2 | Phase 3 | Phase 4 |
| 1B   | 10          | 0          | 14      | 28      | 35      |
| 2D   | 10          | 0          | 10      | 38      | 67      |
| 4D   | 14          | NA         | 0       | 21      | 42      |
| 8B   | 13          | 0          | 13      | 27      | 43      |
| 9D   | 12          | 0          | 29      | 43      | 49      |

**Table S2.** Bacterial families differentially abundant in the bovine-gut microbiota of animals fed with different percentages of forage in diet.

| Family                         | Base Mean  | log2 Fold Change | Lfc SE     | Stat (Wald) | p-value    | p-adj      |
|--------------------------------|------------|------------------|------------|-------------|------------|------------|
| Ruminococcaceae                | 925.388167 | 0.016471         | 0.0007213  | 22.8351089  | 2.05E-115  | 5.45E-114  |
| Prevotellaceae                 | 216.095712 | -0.0143815       | 0.00087637 | -16.410246  | 1.62E-60   | 2.14E-59   |
| Rikenellaceae                  | 280.427889 | 0.01722959       | 0.00105481 | 16.3343473  | 5.62E-60   | 6.62E-59   |
| Lachnospiraceae                | 199.832725 | -0.0032235       | 0.00061375 | -5.2521776  | 1.50E-07   | 4.83E-07   |
| Bacteroidaceae                 | 158.256821 | 0.00520128       | 0.00117731 | 4.41791991  | 9.97E-06   | 2.78E-05   |
| Muribaculaceae                 | 82.2391578 | -0.0407878       | 0.00118366 | -34.459027  | 3.30E-260  | 3.50E-258  |
| Christensenellaceae            | 58.2934835 | 0.02058984       | 0.0012825  | 16.0545191  | 5.31E-58   | 5.63E-57   |
| Spirochaetaceae                | 38.7900993 | -0.0285462       | 0.00210975 | -13.53062   | 1.03E-41   | 7.81E-41   |
| Acidaminococcaceae             | 21.0944346 | -0.0117091       | 0.00101771 | -11.505348  | 1.24E-30   | 6.92E-30   |
| Succinivibrionaceae            | 19.2272586 | -0.0390218       | 0.00304894 | -12.798487  | 1.67E-37   | 1.18E-36   |
| Planococcaceae                 | 3.59067335 | 0.04576269       | 0.0056949  | 8.03572909  | 9.30E-16   | 3.52E-15   |
| Clostridiaceae 1               | 10.3027843 | -0.0332732       | 0.00220972 | -15.057646  | 3.08E-51   | 2.72E-50   |
| Veillonellaceae                | 5.7808527  | -0.009967        | 0.00273246 | -3.6476253  | 0.00026468 | 0.00066799 |
| Bacteroidales RF16 group       | 39.2203283 | 0.02558717       | 0.00188224 | 13.5939779  | 4.35E-42   | 3.55E-41   |
| Enterobacteriaceae             | 3.84993718 | -0.0429341       | 0.00368522 | -11.650361  | 2.28E-31   | 1.42E-30   |
| Erysipelotrichaceae            | 25.0547186 | -0.0057838       | 0.00099778 | -5.7966039  | 6.77E-09   | 2.24E-08   |
| p-2534-18B5 gut group          | 11.5089734 | 0.0655837        | 0.00367406 | 17.8504911  | 2.87E-71   | 5.06E-70   |
| Gastranaerophilales uncultured | 11.6396714 | 0.0086763        | 0.00191412 | 4.53278973  | 5.82E-06   | 1.67E-05   |
| Fibrobacteraceae               | 2.37866879 | -0.0196056       | 0.0045473  | -4.3114863  | 1.62E-05   | 4.30E-05   |
| Neisseriaceae                  | 4.34797435 | 0.01931658       | 0.00612223 | 3.1551537   | 0.00160414 | 0.00377863 |
| Tannerellaceae                 | 11.9284829 | -0.052279        | 0.0020561  | -25.426363  | 1.29E-142  | 4.56E-141  |
| Bacteroidales uncultured       | 37.365088  | 0.03093304       | 0.00202808 | 15.2523773  | 1.59E-52   | 1.53E-51   |
| Family XIII                    | 17.9457517 | 0.01915138       | 0.00110293 | 17.3641336  | 1.54E-67   | 2.34E-66   |
| p-251-o5                       | 6.50850208 | 0.00772406       | 0.00306325 | 2.52152497  | 0.01168474 | 0.0269257  |
| F082                           | 16.1470904 | 0.07207967       | 0.00266119 | 27.0855519  | 1.46E-161  | 7.72E-160  |
| Anaeroplasmataceae             | 3.42937256 | -0.0182558       | 0.00241217 | -7.568193   | 3.78E-14   | 1.38E-13   |
| Barnesiellaceae                | 3.84434886 | 0.01620163       | 0.00214236 | 7.56250378  | 3.95E-14   | 1.40E-13   |
| Burkholderiaceae               | 3.97890005 | -0.0218915       | 0.0019579  | -11.181093  | 5.05E-29   | 2.67E-28   |
| Clostridiales vadinBB60 group  | 14.6173565 | 0.00752756       | 0.00174331 | 4.31797553  | 1.57E-05   | 4.28E-05   |
| Peptococcaceae                 | 9.02004628 | 0.01093276       | 0.00126473 | 8.64431919  | 5.41E-18   | 2.29E-17   |
| Rhodospirillales uncultured    | 7.76393104 | 0.01311455       | 0.00191066 | 6.86389013  | 6.70E-12   | 2.29E-11   |
| Paludibacteraceae              | 5.83377217 | 0.04345508       | 0.00236365 | 18.3847304  | 1.74E-75   | 3.69E-74   |
| EMP G18 uncultured             | 0.69694367 | -0.0361119       | 0.00345028 | -10.466371  | 1.23E-25   | 5.68E-25   |
| Akkermansiaceae                | 2.83223975 | 0.02514747       | 0.0029462  | 8.53556341  | 1.39E-17   | 5.69E-17   |
| Bifidobacteriaceae             | 0.5543199  | -0.0232566       | 0.00603712 | -3.8522622  | 0.00011703 | 0.00030257 |
| Izimaplasmatales uncultured    | 4.60428363 | 0.01951321       | 0.00220312 | 8.85709434  | 8.21E-19   | 3.63E-18   |
| Bacteroidales UCG-001          | 0.97101524 | 0.04805996       | 0.00431028 | 11.150077   | 7.15E-29   | 3.61E-28   |
| Victivallaceae                 | 1.63504024 | 0.04549642       | 0.00394805 | 11.523781   | 1.00E-30   | 5.90E-30   |
| WCHB1 41 uncultured            | 0.63161674 | 0.02284092       | 0.00464949 | 4.91256231  | 8.99E-07   | 2.80E-06   |
| Eggerthellaceae                | 0.42245702 | 0.00785087       | 0.00387652 | 2.02523987  | 0.04284274 | 0.09461105 |
| Desulfovibrionaceae            | 1.33350841 | 0.02477596       | 0.00300461 | 8.24599331  | 1.64E-16   | 6.43E-16   |
| Campylobacteraceae             | 0.36011159 | 0.02246802       | 0.00664923 | 3.37904159  | 0.00072739 | 0.0017931  |
| Marinifilaceae                 | 1.0795931  | 0.03259325       | 0.00274105 | 11.8908113  | 1.32E-32   | 8.75E-32   |
| Dysgonomonadaceae              | 0.4240709  | 0.0274436        | 0.00589212 | 4.65768126  | 3.20E-06   | 9.42E-06   |
| Defluviitaleaceae              | 1.20091909 | 0.0236732        | 0.00218957 | 10.8118247  | 3.03E-27   | 1.46E-26   |
| Eubacteriaceae                 | 0.28369233 | 0.02711129       | 0.00552608 | 4.90606036  | 9.29E-07   | 2.81E-06   |
| gir aah93h0                    | 0.31872427 | 0.01833041       | 0.00576371 | 3.18031613  | 0.00147115 | 0.00354412 |
| Pirellulaceae                  | 0.15741561 | 0.01399368       | 0.00662901 | 2.1109765   | 0.03477433 | 0.07842722 |

\* Coefficients and significance values were calculated with DESeq2.



**Table S3.** Temperature (°C) and relative humidity (RH) the cattle farms during four-sampling phases.

| Phase           | <i>Farms</i> |      |      |      |      |      |      |      |      |      |
|-----------------|--------------|------|------|------|------|------|------|------|------|------|
|                 | 1B           |      | 2D   |      | 4D   |      | 8B   |      | 9D   |      |
|                 | °C           | RH   | °C   | RH   | °C   | RH   | °C   | RH   | °C   | RH   |
| 1               | 13.9         | 56.7 | 19.2 | 66.2 | -    | -    | 22.8 | 71.1 | 30.1 | 46.3 |
| 2               | 19.7         | 93.7 | 24.8 | 59.8 | 23.6 | 62.1 | 24.2 | 46.9 | 24.9 | 35.3 |
| 3               | 23.3         | 54.2 | 25.8 | 84.6 | 19.3 | 69.2 | 24.2 | 50.7 | 18.0 | 53.0 |
| 4               | 16.6         | 66.2 | 19.7 | 68.8 | 13.7 | 82.9 | 22.1 | 68.5 | 18.0 | 56.3 |
| <b>Mean</b>     | 18.4         | 67.7 | 22.4 | 69.8 | 18.9 | 71.4 | 23.3 | 59.3 | 22.8 | 47.7 |
| <b>St. dev.</b> | 4.1          | 18.1 | 3.4  | 10.5 | 5.0  | 10.6 | 1.1  | 12.3 | 5.9  | 9.3  |

**Table S4.** Differentially abundant taxa identified between STEC shedders and non-shedders among dairy farms.

| Taxa                                            | Base Mean | log2 Fold Change | Lfc SE | Stat (Wald) | p-value  | p-adj    |
|-------------------------------------------------|-----------|------------------|--------|-------------|----------|----------|
| <i>Acidaminococcaceae</i>                       | 16.964    | -0.565           | 0.136  | -4.144      | 3.42E-05 | 6.27E-04 |
| <i>Actinobacteria</i>                           | 1.733     | -0.126           | 0.346  | -0.365      | 7.15E-01 | 9.74E-01 |
| <i>Alloprevotella</i>                           | 18.823    | 0.704            | 0.192  | 3.670       | 2.43E-04 | 3.05E-03 |
| <i>Anaerosporebacter</i>                        | 5.126     | -1.363           | 0.340  | -4.011      | 6.04E-05 | 1.33E-03 |
| <i>Anaerovorax</i>                              | 1.491     | -0.598           | 0.252  | -2.369      | 1.78E-02 | 8.26E-02 |
| <i>Bacilli</i>                                  | 1.779     | 2.008            | 0.469  | 4.282       | 1.86E-05 | 5.38E-04 |
| <i>Bacteroidales</i> RF16 group                 | 49.233    | -0.382           | 0.161  | -2.374      | 1.76E-02 | 9.64E-02 |
| <i>Bacteroidales</i> RF16 group uncultured      | 47.789    | -0.368           | 0.159  | -2.312      | 2.08E-02 | 8.30E-02 |
| <i>Bacteroidetes</i>                            | 805.395   | 0.086            | 0.068  | 1.265       | 2.06E-01 | 8.74E-01 |
| <i>Betaproteobacteriales</i>                    | 8.110     | -1.287           | 0.340  | -3.788      | 1.52E-04 | 8.20E-03 |
| <i>Butyrivibrio</i>                             | 2.007     | -0.706           | 0.290  | -2.437      | 1.48E-02 | 7.24E-02 |
| <i>Chloroflexi</i>                              | 0.005     | -0.138           | 4.294  | -0.032      | 9.74E-01 | 9.74E-01 |
| <i>Clostridia</i>                               | 1295.258  | 0.215            | 0.080  | 2.700       | 6.93E-03 | 6.70E-02 |
| <i>Clostridiales</i> vadinBB60 group            | 12.878    | -0.770           | 0.229  | -3.366      | 7.64E-04 | 6.00E-03 |
| <i>Clostridiales</i> vadinBB60 group uncultured | 12.592    | -0.779           | 0.225  | -3.468      | 5.24E-04 | 5.50E-03 |
| <i>Cyanobacteria</i>                            | 11.310    | -0.250           | 0.253  | -0.987      | 3.24E-01 | 9.25E-01 |
| <i>Dependentiae</i>                             | 0.015     | -0.148           | 4.294  | -0.034      | 9.73E-01 | 9.74E-01 |
| <i>dgA</i> 11 gut group                         | 12.519    | -0.666           | 0.230  | -2.891      | 3.84E-03 | 2.39E-02 |
| <i>Elusimicrobia</i>                            | 0.121     | -0.583           | 0.943  | -0.618      | 5.37E-01 | 9.74E-01 |
| <i>EMP</i> G18                                  | 1.703     | -1.015           | 0.324  | -3.137      | 1.71E-03 | 3.08E-02 |
| <i>Epsilonbacteraeota</i>                       | 0.387     | 0.387            | 0.650  | 0.596       | 5.51E-01 | 9.74E-01 |
| <i>Erysipelotrichaceae</i> UCG 004              | 5.192     | -0.768           | 0.236  | -3.250      | 1.15E-03 | 9.23E-03 |
| <i>Euryarchaeota</i>                            | 0.103     | -0.215           | 1.175  | -0.183      | 8.55E-01 | 9.74E-01 |
| <i>F082</i>                                     | 17.074    | -0.777           | 0.264  | -2.947      | 3.20E-03 | 2.20E-02 |
| <i>F082</i> uncultured                          | 16.498    | -0.741           | 0.258  | -2.872      | 4.08E-03 | 2.39E-02 |
| <i>Family</i> XIII AD3011 group                 | 11.696    | 0.293            | 0.138  | 2.124       | 3.36E-02 | 9.87E-02 |
| <i>Fibrobacteres</i>                            | 1.117     | -0.601           | 0.537  | -1.118      | 2.63E-01 | 8.78E-01 |
| <i>Firmicutes</i>                               | 1374.505  | 0.270            | 0.085  | 3.178       | 1.48E-03 | 1.48E-02 |
| <i>Flavobacteriaceae</i>                        | 1.114     | -0.778           | 0.338  | -2.300      | 2.15E-02 | 9.84E-02 |
| <i>Fusobacteria</i>                             | 0.045     | -0.140           | 3.951  | -0.036      | 9.72E-01 | 9.74E-01 |
| <i>Gammaproteobacteria</i>                      | 30.401    | -0.970           | 0.298  | -3.255      | 1.13E-03 | 1.64E-02 |
| <i>Gastranaerophilales</i> uncultured           | 11.109    | -0.561           | 0.262  | -2.144      | 3.20E-02 | 9.87E-02 |
| <i>Izimaplasmatales</i>                         | 4.561     | -0.872           | 0.265  | -3.287      | 1.01E-03 | 2.73E-02 |
| <i>Izimaplasmatales</i> uncultured              | 4.574     | -1.034           | 0.279  | -3.699      | 2.16E-04 | 2.97E-03 |
| <i>Kingella</i>                                 | 2.680     | -1.985           | 0.599  | -3.315      | 9.15E-04 | 8.05E-03 |
| <i>Kiritimatiellaeota</i>                       | 0.441     | -0.352           | 0.544  | -0.648      | 5.17E-01 | 9.74E-01 |
| <i>Lachnospiraceae</i> uncultured               | 49.097    | -0.255           | 0.117  | -2.171      | 3.00E-02 | 9.87E-02 |
| <i>Lentisphaerae</i>                            | 1.809     | -0.560           | 0.455  | -1.231      | 2.18E-01 | 8.74E-01 |
| <i>Neisseriaceae</i>                            | 2.832     | -2.102           | 0.606  | -3.468      | 5.24E-04 | 5.33E-03 |
| <i>Oscillibacter</i>                            | 8.507     | -0.586           | 0.170  | -3.449      | 5.63E-04 | 5.50E-03 |
| <i>p</i> 251 o5                                 | 6.588     | -1.479           | 0.332  | -4.453      | 8.45E-06 | 4.65E-04 |
| <i>p</i> 251 o5 uncultured                      | 6.394     | -1.473           | 0.327  | -4.501      | 6.76E-06 | 5.95E-04 |
| <i>Patescibacteria</i>                          | 0.171     | -0.333           | 0.847  | -0.393      | 6.94E-01 | 9.74E-01 |
| <i>Peptostreptococcaceae</i>                    | 3.878     | 1.096            | 0.259  | 4.225       | 2.38E-05 | 6.27E-04 |
| <i>Phascolarctobacterium</i>                    | 16.879    | -0.551           | 0.135  | -4.072      | 4.66E-05 | 1.33E-03 |
| <i>Planctomycetes</i>                           | 0.206     | 0.072            | 0.694  | 0.103       | 9.18E-01 | 9.74E-01 |
| <i>Proteobacteria</i>                           | 37.276    | -0.772           | 0.209  | -3.696      | 2.19E-04 | 4.38E-03 |
| <i>Rhodospirillales</i> uncultured              | 7.588     | -0.599           | 0.254  | -2.362      | 1.82E-02 | 9.64E-02 |
| <i>Rikenellaceae</i>                            | 307.035   | -0.232           | 0.099  | -2.340      | 1.93E-02 | 9.64E-02 |
| <i>Rikenellaceae</i> RC9 gut group              | 201.900   | -0.307           | 0.100  | -3.063      | 2.19E-03 | 1.49E-02 |
| <i>Romboutsia</i>                               | 3.706     | 1.039            | 0.268  | 3.882       | 1.04E-04 | 1.83E-03 |
| <i>Roseburia</i>                                | 17.073    | -0.971           | 0.226  | -4.302      | 1.69E-05 | 7.45E-04 |
| <i>Ruminobacter</i>                             | 6.761     | -1.070           | 0.434  | -2.467      | 1.36E-02 | 7.05E-02 |
| <i>Ruminococcaceae</i> UCG 005                  | 292.663   | 0.220            | 0.087  | 2.520       | 1.17E-02 | 6.46E-02 |
| <i>Ruminococcaceae</i> UCG 010                  | 201.363   | -0.366           | 0.172  | -2.131      | 3.31E-02 | 9.87E-02 |
| <i>Ruminococcaceae</i> UCG 011                  | 1.814     | 0.761            | 0.244  | 3.116       | 1.83E-03 | 1.34E-02 |
| <i>Ruminococcus</i> 1                           | 19.058    | 0.308            | 0.142  | 2.172       | 2.98E-02 | 9.87E-02 |
| <i>Ruminococcus</i> 2                           | 4.029     | -0.521           | 0.240  | -2.174      | 2.97E-02 | 9.87E-02 |

**Table S4.** Continued...

| <b>Taxa</b>                                | <b>Base Mean</b> | <b>log2 Fold Change</b> | <b>Lfc SE</b> | <b>Stat (Wald)</b> | <b>p-value</b> | <b>p-adj</b> |
|--------------------------------------------|------------------|-------------------------|---------------|--------------------|----------------|--------------|
| <i>Spirochaetes</i>                        | 22.492           | 0.202                   | 0.235         | 0.858              | 3.91E-01       | 9.74E-01     |
| <i>Synergistetes</i>                       | 0.009            | -0.162                  | 4.294         | -0.038             | 9.70E-01       | 9.74E-01     |
| <i>Tenericutes</i>                         | 40.104           | 0.011                   | 0.108         | 0.106              | 9.16E-01       | 9.74E-01     |
| <i>Tyzzerella 4</i>                        | 10.987           | 0.404                   | 0.174         | 2.319              | 2.04E-02       | 8.30E-02     |
| <i>Veillonellaceae</i>                     | 6.441            | 1.191                   | 0.346         | 3.440              | 5.82E-04       | 5.33E-03     |
| <i>Verrucomicrobia</i>                     | 3.755            | 0.691                   | 0.314         | 2.203              | 2.76E-02       | 1.84E-01     |
| <i>Eubacterium coprostanoligenes</i> group | 95.526           | 0.227                   | 0.098         | 2.323              | 2.02E-02       | 8.30E-02     |
| <i>Eubacterium ruminantium</i> group       | 2.788            | 0.578                   | 0.262         | 2.208              | 2.72E-02       | 9.87E-02     |

**Table S5.** Taxa correlated with factors associated with STEC carriage.

| Risk factor       | Taxa                                       | Base Mean | log2 Fold Change | Lfc SE | Stat (Wald) | p-value  | p-adj    |
|-------------------|--------------------------------------------|-----------|------------------|--------|-------------|----------|----------|
| DIM               | <i>Acetitomaculum</i>                      | 1.090     | 0.003            | 0.001  | 2.447       | 1.44E-02 | 9.94E-02 |
| DIM               | <i>Actinobacteria</i>                      | 3.135     | 0.004            | 0.001  | 3.432       | 5.99E-04 | 5.99E-03 |
| DIM               | <i>Anaerosporebacter</i>                   | 5.185     | 0.003            | 0.001  | 3.159       | 1.58E-03 | 4.15E-02 |
| DIM               | <i>Anaerovibrio</i>                        | 5.509     | -0.005           | 0.001  | -4.567      | 4.94E-06 | 6.47E-04 |
| DIM               | <i>Cellulosilyticum</i>                    | 1.657     | -0.003           | 0.001  | -2.631      | 8.52E-03 | 7.44E-02 |
| DIM               | <i>Coprococcus 3</i>                       | 10.675    | -0.001           | 0.001  | -2.546      | 1.09E-02 | 8.34E-02 |
| DIM               | <i>Enterobacteriaceae</i>                  | 3.542     | -0.005           | 0.002  | -3.417      | 6.34E-04 | 3.04E-02 |
| DIM               | <i>Escherichia Shigella</i>                | 4.099     | -0.006           | 0.002  | -3.382      | 7.19E-04 | 2.36E-02 |
| DIM               | <i>hoa5 07d05 gut group</i>                | 1.354     | 0.009            | 0.002  | 3.844       | 1.21E-04 | 6.85E-03 |
| DIM               | <i>Kingella</i>                            | 4.855     | 0.004            | 0.002  | 2.528       | 1.15E-02 | 8.34E-02 |
| DIM               | <i>Mollicutes RF39 uncultured</i>          | 28.987    | -0.001           | 0.000  | -2.792      | 5.23E-03 | 6.86E-02 |
| DIM               | <i>Prevotellaceae UCG 003</i>              | 65.196    | -0.001           | 0.000  | -3.780      | 1.57E-04 | 6.85E-03 |
| DIM               | <i>Ruminiclostridium</i>                   | 3.758     | 0.002            | 0.001  | 2.667       | 7.65E-03 | 7.44E-02 |
| DIM               | <i>Ruminiclostridium 1</i>                 | 2.112     | 0.002            | 0.001  | 2.738       | 6.19E-03 | 7.37E-02 |
| DIM               | <i>Ruminiclostridium 6</i>                 | 1.690     | -0.002           | 0.001  | -2.540      | 1.11E-02 | 8.34E-02 |
| DIM               | <i>Ruminococcaceae</i>                     | 878.919   | 0.001            | 0.000  | 3.785       | 1.54E-04 | 1.48E-02 |
| DIM               | <i>Ruminococcaceae UCG 005</i>             | 291.274   | 0.001            | 0.000  | 2.850       | 4.37E-03 | 6.36E-02 |
| DIM               | <i>Ruminococcaceae UCG 009</i>             | 20.770    | 0.001            | 0.000  | 2.679       | 7.39E-03 | 7.44E-02 |
| DIM               | <i>Ruminococcaceae uncultured</i>          | 53.067    | 0.001            | 0.000  | 2.885       | 3.92E-03 | 6.36E-02 |
| DIM               | <i>Tenericutes</i>                         | 39.895    | -0.001           | 0.000  | -3.494      | 4.75E-04 | 5.99E-03 |
| DIM               | <i>Turicibacter</i>                        | 1.191     | -0.003           | 0.001  | -3.039      | 2.37E-03 | 5.18E-02 |
| DIM               | <i>Veillonellaceae</i>                     | 6.451     | -0.003           | 0.001  | -3.125      | 1.78E-03 | 5.70E-02 |
| DIM               | <i>Veillonellaceae uncultured</i>          | 0.987     | -0.003           | 0.001  | -2.653      | 7.99E-03 | 7.44E-02 |
| DIM               | <i>Eubacterium ruminantium group</i>       | 2.802     | -0.002           | 0.001  | -2.864      | 4.18E-03 | 6.36E-02 |
| Lactations        | <i>Kingella</i>                            | 4.855     | 0.610            | 0.167  | 3.644       | 2.69E-04 | 4.06E-02 |
| Lactations        | <i>Lentisphaerae</i>                       | 1.779     | -0.392           | 0.125  | -3.135      | 1.72E-03 | 3.43E-02 |
| Lactations        | <i>Neisseriaceae</i>                       | 5.068     | 0.631            | 0.169  | 3.738       | 1.86E-04 | 1.87E-02 |
| Lactations        | <i>Ruminococcaceae UCG 004</i>             | 2.279     | -0.226           | 0.066  | -3.409      | 6.52E-04 | 5.04E-02 |
| Lactations        | <i>Ruminococcaceae UCG 011</i>             | 1.809     | -0.247           | 0.076  | -3.267      | 1.09E-03 | 6.56E-02 |
| Lactations        | <i>Victivallaceae uncultured</i>           | 1.182     | -0.530           | 0.143  | -3.706      | 2.11E-04 | 4.06E-02 |
| Lactations        | <i>Eubacterium oxidoreducens group</i>     | 7.138     | -0.177           | 0.052  | -3.403      | 6.67E-04 | 5.04E-02 |
| Temp. ave. 5 days | <i>Acetitomaculum</i>                      | 0.589     | 0.060            | 0.026  | 2.342       | 1.92E-02 | 3.54E-02 |
| Temp. ave. 5 days | <i>Acidaminococcaceae</i>                  | 21.088    | -0.073           | 0.007  | -10.709     | 9.28E-27 | 7.66E-26 |
| Temp. ave. 5 days | <i>Agathobacter</i>                        | 5.579     | -0.058           | 0.016  | -3.659      | 2.53E-04 | 5.68E-04 |
| Temp. ave. 5 days | <i>Akkermansia</i>                         | 3.372     | 0.155            | 0.021  | 7.309       | 2.68E-13 | 1.11E-12 |
| Temp. ave. 5 days | <i>Akkermansiaceae</i>                     | 2.829     | 0.124            | 0.020  | 6.274       | 3.52E-10 | 1.01E-09 |
| Temp. ave. 5 days | <i>Alistipes</i>                           | 109.863   | 0.190            | 0.013  | 15.161      | 6.45E-52 | 2.87E-50 |
| Temp. ave. 5 days | <i>Alloprevotella</i>                      | 36.572    | -0.082           | 0.011  | -7.130      | 1.00E-12 | 4.03E-12 |
| Temp. ave. 5 days | <i>Anaerofustis</i>                        | 0.350     | 0.173            | 0.040  | 4.290       | 1.79E-05 | 4.27E-05 |
| Temp. ave. 5 days | <i>Anaeroplasmataceae</i>                  | 3.288     | -0.046           | 0.016  | -2.781      | 5.42E-03 | 1.12E-02 |
| Temp. ave. 5 days | <i>Anaeroplasmataceae</i>                  | 3.442     | -0.085           | 0.016  | -5.210      | 1.89E-07 | 4.16E-07 |
| Temp. ave. 5 days | <i>Anaerosporebacter</i>                   | 3.314     | -0.072           | 0.016  | -4.544      | 5.51E-06 | 1.39E-05 |
| Temp. ave. 5 days | <i>Anaerostipes</i>                        | 0.385     | -0.089           | 0.037  | -2.370      | 1.78E-02 | 3.33E-02 |
| Temp. ave. 5 days | <i>Anaerovorax</i>                         | 1.744     | 0.084            | 0.015  | 5.414       | 6.17E-08 | 1.81E-07 |
| Temp. ave. 5 days | <i>Angelakisella</i>                       | 0.488     | 0.060            | 0.025  | 2.466       | 1.36E-02 | 2.63E-02 |
| Temp. ave. 5 days | <i>Bacteroidaceae</i>                      | 158.040   | 0.041            | 0.008  | 5.264       | 1.41E-07 | 3.21E-07 |
| Temp. ave. 5 days | <i>Bacteroidales RF16 group</i>            | 39.216    | 0.108            | 0.013  | 8.197       | 2.47E-16 | 1.02E-15 |
| Temp. ave. 5 days | <i>Bacteroidales RF16 group uncultured</i> | 45.003    | 0.136            | 0.015  | 9.296       | 1.45E-20 | 9.29E-20 |
| Temp. ave. 5 days | <i>Bacteroidales UCG 001</i>               | 0.969     | 0.263            | 0.033  | 7.860       | 3.85E-15 | 1.49E-14 |
| Temp. ave. 5 days | <i>Bacteroidales UCG 001 uncultured</i>    | 1.414     | 0.327            | 0.036  | 9.182       | 4.23E-20 | 2.51E-19 |
| Temp. ave. 5 days | <i>Bacteroidales uncultured</i>            | 37.465    | 0.137            | 0.015  | 9.228       | 2.76E-20 | 1.30E-19 |
| Temp. ave. 5 days | <i>Bacteroidales uncultured uncultured</i> | 48.553    | 0.177            | 0.017  | 10.592      | 3.26E-26 | 2.70E-25 |
| Temp. ave. 5 days | <i>Bacteroides</i>                         | 172.942   | 0.081            | 0.009  | 8.750       | 2.13E-18 | 1.10E-17 |
| Temp. ave. 5 days | <i>Bacteroidetes</i>                       | 815.667   | -0.027           | 0.003  | -10.258     | 1.09E-24 | 1.09E-23 |
| Temp. ave. 5 days | <i>Barnesiellaceae</i>                     | 3.845     | 0.088            | 0.014  | 6.140       | 8.26E-10 | 2.18E-09 |
| Temp. ave. 5 days | <i>Barnesiellaceae uncultured</i>          | 4.623     | 0.126            | 0.016  | 7.981       | 1.45E-15 | 7.07E-15 |
| Temp. ave. 5 days | <i>Blautia</i>                             | 2.917     | -0.054           | 0.012  | -4.320      | 1.56E-05 | 3.77E-05 |
| Temp. ave. 5 days | <i>Breznakia</i>                           | 0.515     | 0.057            | 0.022  | 2.573       | 1.01E-02 | 2.01E-02 |

Table S5. Continued...

| Risk factor       | Taxa                                             | Base Mean | log2 Fold Change | Lfc SE | Stat (Wald) | p-value  | p-adj    |
|-------------------|--------------------------------------------------|-----------|------------------|--------|-------------|----------|----------|
| Temp. ave. 5 days | <i>Burkholderiaceae</i>                          | 3.976     | -0.124           | 0.013  | -9.305      | 1.34E-20 | 6.82E-20 |
| Temp. ave. 5 days | <i>Butyrivibrio</i>                              | 2.268     | -0.097           | 0.015  | -6.493      | 8.42E-11 | 3.08E-10 |
| Temp. ave. 5 days | <i>Campylobacter</i>                             | 0.496     | 0.125            | 0.045  | 2.765       | 5.68E-03 | 1.16E-02 |
| Temp. ave. 5 days | <i>Campylobacteraceae</i>                        | 0.361     | 0.083            | 0.044  | 1.878       | 6.04E-02 | 9.73E-02 |
| Temp. ave. 5 days | <i>Candidatus Soleaferrea</i>                    | 8.859     | 0.106            | 0.012  | 8.614       | 7.08E-18 | 3.60E-17 |
| Temp. ave. 5 days | <i>Candidatus Stoquefichus</i>                   | 0.565     | 0.153            | 0.029  | 5.343       | 9.14E-08 | 2.65E-07 |
| Temp. ave. 5 days | <i>Caproiciproducens</i>                         | 3.157     | 0.153            | 0.021  | 7.251       | 4.14E-13 | 1.69E-12 |
| Temp. ave. 5 days | <i>Christensenellaceae</i>                       | 58.524    | 0.092            | 0.009  | 10.064      | 8.00E-24 | 4.40E-23 |
| Temp. ave. 5 days | <i>Christensenellaceae R 7 group</i>             | 65.228    | 0.134            | 0.011  | 12.767      | 2.51E-37 | 4.80E-36 |
| Temp. ave. 5 days | <i>Christensenellaceae uncultured</i>            | 1.045     | 0.161            | 0.021  | 7.670       | 1.72E-14 | 7.40E-14 |
| Temp. ave. 5 days | <i>Clostridiaceae 1</i>                          | 10.278    | -0.098           | 0.016  | -6.157      | 7.40E-10 | 2.03E-09 |
| Temp. ave. 5 days | <i>Clostridiales vadinBB60 group uncultured</i>  | 17.824    | 0.052            | 0.014  | 3.774       | 1.61E-04 | 3.67E-04 |
| Temp. ave. 5 days | <i>Clostridium sensu stricto 1</i>               | 8.921     | -0.086           | 0.015  | -5.645      | 1.65E-08 | 5.08E-08 |
| Temp. ave. 5 days | <i>Clostridium sensu stricto 6</i>               | 0.218     | 0.192            | 0.068  | 2.849       | 4.39E-03 | 9.11E-03 |
| Temp. ave. 5 days | <i>Coprobacillus</i>                             | 0.657     | 0.147            | 0.025  | 5.934       | 2.96E-09 | 9.46E-09 |
| Temp. ave. 5 days | <i>Coprococcus 3</i>                             | 8.955     | 0.077            | 0.011  | 6.808       | 9.88E-12 | 3.67E-11 |
| Temp. ave. 5 days | <i>Deftuviitaleaceae</i>                         | 1.201     | 0.108            | 0.015  | 7.402       | 1.34E-13 | 4.91E-13 |
| Temp. ave. 5 days | <i>Deftuviitaleaceae UCG 011</i>                 | 1.394     | 0.150            | 0.016  | 9.208       | 3.33E-20 | 2.02E-19 |
| Temp. ave. 5 days | <i>Desulfovibrionaceae</i>                       | 1.345     | 0.079            | 0.020  | 3.846       | 1.20E-04 | 2.47E-04 |
| Temp. ave. 5 days | <i>dgA 11 gut group</i>                          | 15.168    | 0.251            | 0.020  | 12.338      | 5.67E-35 | 8.83E-34 |
| Temp. ave. 5 days | <i>Dielma</i>                                    | 1.601     | 0.207            | 0.018  | 11.579      | 5.26E-31 | 5.95E-30 |
| Temp. ave. 5 days | <i>Dorea</i>                                     | 1.557     | 0.140            | 0.015  | 9.211       | 3.22E-20 | 2.01E-19 |
| Temp. ave. 5 days | <i>Dysgonomonadaceae</i>                         | 0.429     | 0.085            | 0.039  | 2.145       | 3.20E-02 | 5.41E-02 |
| Temp. ave. 5 days | <i>Dysgonomonadaceae uncultured</i>              | 0.574     | 0.129            | 0.041  | 3.151       | 1.62E-03 | 3.40E-03 |
| Temp. ave. 5 days | <i>Eisenbergiella</i>                            | 0.600     | 0.113            | 0.022  | 5.089       | 3.61E-07 | 9.76E-07 |
| Temp. ave. 5 days | <i>EMP G18 uncultured</i>                        | 0.699     | -0.219           | 0.025  | -8.912      | 5.01E-19 | 2.21E-18 |
| Temp. ave. 5 days | <i>EMP G18 uncultured uncultured</i>             | 0.579     | -0.171           | 0.024  | -7.026      | 2.13E-12 | 8.42E-12 |
| Temp. ave. 5 days | <i>Enterobacteriaceae</i>                        | 3.896     | -0.278           | 0.026  | -10.904     | 1.10E-27 | 1.04E-26 |
| Temp. ave. 5 days | <i>Enterorhabdus</i>                             | 0.263     | 0.078            | 0.032  | 2.403       | 1.62E-02 | 3.06E-02 |
| Temp. ave. 5 days | <i>Erysipelatoclostridium</i>                    | 1.148     | 0.134            | 0.019  | 6.993       | 2.68E-12 | 1.04E-11 |
| Temp. ave. 5 days | <i>Erysipelotrichaceae</i>                       | 25.112    | -0.039           | 0.007  | -5.951      | 2.66E-09 | 6.76E-09 |
| Temp. ave. 5 days | <i>Erysipelotrichaceae UCG 004</i>               | 7.657     | -0.118           | 0.012  | -9.503      | 2.03E-21 | 1.41E-20 |
| Temp. ave. 5 days | <i>Erysipelotrichaceae uncultured</i>            | 4.261     | 0.061            | 0.012  | 5.000       | 5.74E-07 | 1.54E-06 |
| Temp. ave. 5 days | <i>Escherichia Shigella</i>                      | 3.707     | -0.251           | 0.026  | -9.621      | 6.52E-22 | 4.64E-21 |
| Temp. ave. 5 days | <i>Eubacteriaceae</i>                            | 0.282     | 0.125            | 0.039  | 3.205       | 1.35E-03 | 2.62E-03 |
| Temp. ave. 5 days | <i>F082</i>                                      | 16.219    | 0.279            | 0.021  | 13.111      | 2.83E-39 | 6.23E-38 |
| Temp. ave. 5 days | <i>F082 uncultured</i>                           | 22.149    | 0.307            | 0.023  | 13.170      | 1.30E-39 | 4.04E-38 |
| Temp. ave. 5 days | <i>Faecalibacterium</i>                          | 1.676     | -0.294           | 0.024  | -12.485     | 9.01E-36 | 1.50E-34 |
| Temp. ave. 5 days | <i>Faecalitalea</i>                              | 0.722     | 0.089            | 0.024  | 3.764       | 1.67E-04 | 3.79E-04 |
| Temp. ave. 5 days | <i>Family XIII</i>                               | 18.016    | 0.084            | 0.008  | 10.242      | 1.29E-24 | 7.72E-24 |
| Temp. ave. 5 days | <i>Family XIII AD3011 group</i>                  | 14.182    | 0.120            | 0.010  | 11.735      | 8.45E-32 | 1.00E-30 |
| Temp. ave. 5 days | <i>Family XIII UCG 001</i>                       | 1.008     | 0.147            | 0.019  | 7.822       | 5.18E-15 | 2.39E-14 |
| Temp. ave. 5 days | <i>Fibrobacter</i>                               | 2.692     | -0.065           | 0.032  | -2.025      | 4.29E-02 | 7.68E-02 |
| Temp. ave. 5 days | <i>Fibrobacteraceae</i>                          | 2.368     | -0.092           | 0.031  | -3.006      | 2.65E-03 | 4.86E-03 |
| Temp. ave. 5 days | <i>Fibrobacteres</i>                             | 2.227     | -0.113           | 0.030  | -3.738      | 1.85E-04 | 5.30E-04 |
| Temp. ave. 5 days | <i>Firmicutes</i>                                | 1213.811  | 0.024            | 0.003  | 7.693       | 1.43E-14 | 9.56E-14 |
| Temp. ave. 5 days | <i>Fournierella</i>                              | 0.385     | -0.183           | 0.042  | -4.386      | 1.15E-05 | 2.82E-05 |
| Temp. ave. 5 days | <i>Gastranaerophilales uncultured</i>            | 11.682    | 0.025            | 0.013  | 1.936       | 5.28E-02 | 8.72E-02 |
| Temp. ave. 5 days | <i>Gastranaerophilales uncultured uncultured</i> | 14.264    | 0.065            | 0.015  | 4.439       | 9.03E-06 | 2.23E-05 |
| Temp. ave. 5 days | <i>GCA 900066225</i>                             | 0.482     | 0.057            | 0.022  | 2.597       | 9.40E-03 | 1.89E-02 |
| Temp. ave. 5 days | <i>gir aah93h0 uncultured</i>                    | 0.432     | 0.099            | 0.039  | 2.526       | 1.15E-02 | 2.26E-02 |
| Temp. ave. 5 days | <i>GWE2 31 10</i>                                | 0.908     | 0.152            | 0.036  | 4.258       | 2.06E-05 | 4.89E-05 |
| Temp. ave. 5 days | <i>hoa5 07d05 gut group</i>                      | 3.627     | -0.319           | 0.032  | -10.065     | 7.85E-24 | 5.92E-23 |
| Temp. ave. 5 days | <i>Hydrogenoanaerobacterium</i>                  | 0.533     | 0.136            | 0.029  | 4.736       | 2.18E-06 | 5.53E-06 |
| Temp. ave. 5 days | <i>Intestinimonas</i>                            | 0.252     | 0.117            | 0.050  | 2.351       | 1.87E-02 | 3.48E-02 |
| Temp. ave. 5 days | <i>Izimaplasmatales uncultured</i>               | 4.620     | 0.057            | 0.015  | 3.772       | 1.62E-04 | 3.24E-04 |
| Temp. ave. 5 days | <i>Izimaplasmatales uncultured uncultured</i>    | 5.922     | 0.091            | 0.017  | 5.286       | 1.25E-07 | 3.50E-07 |
| Temp. ave. 5 days | <i>Kingella</i>                                  | 3.801     | -0.156           | 0.041  | -3.815      | 1.36E-04 | 3.14E-04 |

Table S5. Continued...

| Risk factor       | Taxa                                         | Base Mean | log2 Fold Change | Lfc SE | Stat (Wald) | p-value  | p-adj    |
|-------------------|----------------------------------------------|-----------|------------------|--------|-------------|----------|----------|
| Temp. ave. 5 days | <i>Lachnoclostridium</i>                     | 2.147     | -0.069           | 0.014  | -4.900      | 9.58E-07 | 2.48E-06 |
| Temp. ave. 5 days | <i>Lachnoclostridium</i> 10                  | 1.954     | 0.122            | 0.018  | 6.886       | 5.72E-12 | 2.19E-11 |
| Temp. ave. 5 days | <i>Lachnospira</i>                           | 0.378     | 0.120            | 0.027  | 4.483       | 7.35E-06 | 1.83E-05 |
| Temp. ave. 5 days | <i>Lachnospiraceae</i> FCS020 group          | 7.043     | 0.087            | 0.011  | 7.911       | 2.55E-15 | 1.22E-14 |
| Temp. ave. 5 days | <i>Lachnospiraceae</i> NC2004 group          | 0.196     | 0.100            | 0.039  | 2.546       | 1.09E-02 | 2.15E-02 |
| Temp. ave. 5 days | <i>Lachnospiraceae</i> NK3A20 group          | 0.815     | 0.105            | 0.021  | 4.966       | 6.85E-07 | 1.79E-06 |
| Temp. ave. 5 days | <i>Lachnospiraceae</i> NK4A136 group         | 30.785    | 0.084            | 0.008  | 11.208      | 3.72E-29 | 3.20E-28 |
| Temp. ave. 5 days | <i>Lachnospiraceae</i> UCG 001               | 2.267     | 0.041            | 0.012  | 3.494       | 4.75E-04 | 1.03E-03 |
| Temp. ave. 5 days | <i>Lachnospiraceae</i> UCG 008               | 0.807     | 0.122            | 0.018  | 6.866       | 6.58E-12 | 2.48E-11 |
| Temp. ave. 5 days | <i>Lachnospiraceae</i> UCG 010               | 0.359     | 0.090            | 0.025  | 3.604       | 3.13E-04 | 6.84E-04 |
| Temp. ave. 5 days | <i>Lentisphaerae</i>                         | 1.494     | 0.118            | 0.024  | 4.853       | 1.22E-06 | 4.06E-06 |
| Temp. ave. 5 days | <i>Lysinibacillus</i>                        | 3.163     | 0.333            | 0.044  | 7.569       | 3.76E-14 | 1.59E-13 |
| Temp. ave. 5 days | <i>Mailhella</i>                             | 1.720     | 0.119            | 0.022  | 5.303       | 1.14E-07 | 3.22E-07 |
| Temp. ave. 5 days | <i>Marinifilaceae</i>                        | 1.084     | 0.133            | 0.019  | 7.179       | 7.03E-13 | 2.44E-12 |
| Temp. ave. 5 days | <i>Marvinbryantia</i>                        | 0.676     | 0.035            | 0.018  | 1.913       | 5.57E-02 | 9.84E-02 |
| Temp. ave. 5 days | <i>Mogibacterium</i>                         | 0.451     | 0.153            | 0.025  | 6.026       | 1.68E-09 | 5.67E-09 |
| Temp. ave. 5 days | <i>Mollicutes</i> RF39 uncultured            | 28.057    | 0.024            | 0.009  | 2.730       | 6.33E-03 | 1.13E-02 |
| Temp. ave. 5 days | <i>Mollicutes</i> RF39 uncultured uncultured | 30.091    | 0.056            | 0.010  | 5.630       | 1.80E-08 | 5.48E-08 |
| Temp. ave. 5 days | <i>Muribaculaceae</i>                        | 82.089    | -0.186           | 0.010  | -18.328     | 4.94E-75 | 3.26E-73 |
| Temp. ave. 5 days | <i>Muribaculaceae</i> uncultured             | 76.161    | -0.156           | 0.010  | -15.156     | 6.90E-52 | 2.87E-50 |
| Temp. ave. 5 days | <i>Muribaculum</i>                           | 0.212     | -0.102           | 0.042  | -2.423      | 1.54E-02 | 2.92E-02 |
| Temp. ave. 5 days | <i>Negativibacillus</i>                      | 5.267     | 0.143            | 0.012  | 11.494      | 1.41E-30 | 1.53E-29 |
| Temp. ave. 5 days | <i>Neisseriaceae</i>                         | 4.335     | -0.196           | 0.041  | -4.768      | 1.86E-06 | 3.96E-06 |
| Temp. ave. 5 days | <i>Odoribacter</i>                           | 1.244     | 0.198            | 0.021  | 9.368       | 7.39E-21 | 4.84E-20 |
| Temp. ave. 5 days | <i>Oscillibacter</i>                         | 11.406    | -0.073           | 0.009  | -7.775      | 7.56E-15 | 3.42E-14 |
| Temp. ave. 5 days | <i>Oscillospira</i>                          | 0.428     | -0.147           | 0.029  | -5.138      | 2.77E-07 | 7.58E-07 |
| Temp. ave. 5 days | <i>p</i> 1088 a5 gut group                   | 0.222     | 0.102            | 0.045  | 2.299       | 2.15E-02 | 3.91E-02 |
| Temp. ave. 5 days | <i>p</i> 251 o5 uncultured                   | 7.801     | 0.060            | 0.022  | 2.735       | 6.24E-03 | 1.26E-02 |
| Temp. ave. 5 days | <i>p</i> 2534 18B5 gut group                 | 11.434    | 0.324            | 0.027  | 12.144      | 6.15E-34 | 6.76E-33 |
| Temp. ave. 5 days | <i>p</i> 2534 18B5 gut group uncultured      | 15.088    | 0.348            | 0.028  | 12.279      | 1.17E-34 | 1.71E-33 |
| Temp. ave. 5 days | <i>Paeniclostridium</i>                      | 1.292     | 0.071            | 0.029  | 2.498       | 1.25E-02 | 2.43E-02 |
| Temp. ave. 5 days | <i>Paludibacter</i>                          | 0.555     | 0.133            | 0.041  | 3.251       | 1.15E-03 | 2.43E-03 |
| Temp. ave. 5 days | <i>Paludibacteraceae</i>                     | 5.829     | 0.183            | 0.017  | 10.595      | 3.13E-26 | 2.29E-25 |
| Temp. ave. 5 days | <i>Paludibacteraceae</i> uncultured          | 6.698     | 0.240            | 0.019  | 12.580      | 2.71E-36 | 4.81E-35 |
| Temp. ave. 5 days | <i>Papillibacter</i>                         | 1.281     | 0.205            | 0.022  | 9.454       | 3.27E-21 | 2.20E-20 |
| Temp. ave. 5 days | <i>Parabacteroides</i>                       | 10.695    | -0.215           | 0.016  | -13.027     | 8.61E-39 | 2.38E-37 |
| Temp. ave. 5 days | <i>Parasutterella</i>                        | 1.714     | 0.119            | 0.019  | 6.212       | 5.24E-10 | 1.79E-09 |
| Temp. ave. 5 days | <i>Peptococcaceae</i>                        | 9.032     | 0.046            | 0.009  | 5.331       | 9.77E-08 | 2.30E-07 |
| Temp. ave. 5 days | <i>Peptococcaceae</i> uncultured             | 10.223    | 0.089            | 0.010  | 8.887       | 6.30E-19 | 3.48E-18 |
| Temp. ave. 5 days | <i>Phascolarctobacterium</i>                 | 21.559    | -0.039           | 0.008  | -4.863      | 1.16E-06 | 2.97E-06 |
| Temp. ave. 5 days | <i>Planococcaceae</i>                        | 3.612     | 0.294            | 0.041  | 7.109       | 1.17E-12 | 3.86E-12 |
| Temp. ave. 5 days | <i>Prevotella</i> 2                          | 12.415    | -0.635           | 0.037  | -17.189     | 3.23E-66 | 4.02E-64 |
| Temp. ave. 5 days | <i>Prevotella</i> 9                          | 25.457    | -0.442           | 0.034  | -12.852     | 8.38E-38 | 1.90E-36 |
| Temp. ave. 5 days | <i>Prevotellaceae</i>                        | 215.494   | -0.080           | 0.006  | -12.926     | 3.22E-38 | 5.32E-37 |
| Temp. ave. 5 days | <i>Prevotellaceae</i> Ga6A1 group            | 0.675     | 0.107            | 0.028  | 3.869       | 1.09E-04 | 2.54E-04 |
| Temp. ave. 5 days | <i>Prevotellaceae</i> NK3B31 group           | 3.745     | -0.243           | 0.041  | -5.942      | 2.81E-09 | 9.09E-09 |
| Temp. ave. 5 days | <i>Prevotellaceae</i> UCG 001                | 14.031    | -0.077           | 0.012  | -6.343      | 2.26E-10 | 7.93E-10 |
| Temp. ave. 5 days | <i>Prevotellaceae</i> UCG 003                | 72.565    | 0.089            | 0.010  | 8.760       | 1.95E-18 | 1.03E-17 |
| Temp. ave. 5 days | <i>Prevotellaceae</i> UCG 004                | 29.292    | 0.247            | 0.017  | 14.828      | 9.69E-50 | 3.45E-48 |
| Temp. ave. 5 days | <i>Prevotellaceae</i> uncultured             | 13.029    | -0.435           | 0.034  | -12.972     | 1.77E-38 | 4.40E-37 |
| Temp. ave. 5 days | <i>Proteobacteria</i>                        | 45.934    | -0.134           | 0.012  | -11.193     | 4.40E-29 | 8.79E-28 |
| Temp. ave. 5 days | <i>Rhodospirillales</i> uncultured           | 7.810     | 0.040            | 0.013  | 3.071       | 2.13E-03 | 4.02E-03 |
| Temp. ave. 5 days | <i>Rikenellaceae</i>                         | 280.580   | 0.079            | 0.008  | 10.351      | 4.16E-25 | 2.74E-24 |
| Temp. ave. 5 days | <i>Rikenellaceae</i> RC9 gut group           | 195.183   | 0.094            | 0.009  | 9.998       | 1.55E-23 | 1.14E-22 |
| Temp. ave. 5 days | <i>Romboutsia</i>                            | 3.852     | 0.033            | 0.014  | 2.331       | 1.98E-02 | 3.62E-02 |
| Temp. ave. 5 days | <i>Roseburia</i>                             | 12.998    | 0.020            | 0.010  | 1.971       | 4.88E-02 | 8.68E-02 |

| Risk factor       | Taxa                                       | Base Mean | log2 Fold Change | Lfc SE | Stat (Wald) | p-value  | p-adj    |
|-------------------|--------------------------------------------|-----------|------------------|--------|-------------|----------|----------|
| Temp. ave. 5 days | <i>Ruminiclostridium</i>                   | 5.484     | 0.220            | 0.018  | 12.235      | 2.02E-34 | 2.80E-33 |
| Temp. ave. 5 days | <i>Ruminiclostridium 1</i>                 | 2.571     | 0.209            | 0.020  | 10.580      | 3.71E-26 | 2.98E-25 |
| Temp. ave. 5 days | <i>Ruminiclostridium 5</i>                 | 1.505     | 0.115            | 0.015  | 7.858       | 3.89E-15 | 1.83E-14 |
| Temp. ave. 5 days | <i>Ruminiclostridium 6</i>                 | 1.453     | 0.069            | 0.019  | 3.619       | 2.95E-04 | 6.51E-04 |
| Temp. ave. 5 days | <i>Ruminiclostridium 9</i>                 | 4.310     | 0.045            | 0.014  | 3.276       | 1.05E-03 | 2.24E-03 |
| Temp. ave. 5 days | <i>Ruminobacter</i>                        | 8.235     | -0.135           | 0.023  | -5.850      | 4.91E-09 | 1.55E-08 |
| Temp. ave. 5 days | <i>Ruminococcaceae</i>                     | 925.563   | 0.075            | 0.006  | 12.879      | 5.90E-38 | 7.79E-37 |
| Temp. ave. 5 days | <i>Ruminococcaceae NK4A214 group</i>       | 15.240    | 0.213            | 0.012  | 17.462      | 2.80E-68 | 6.96E-66 |
| Temp. ave. 5 days | <i>Ruminococcaceae UCG 002</i>             | 14.349    | 0.125            | 0.014  | 9.070       | 1.19E-19 | 6.89E-19 |
| Temp. ave. 5 days | <i>Ruminococcaceae UCG 004</i>             | 2.800     | 0.158            | 0.014  | 11.283      | 1.59E-29 | 1.42E-28 |
| Temp. ave. 5 days | <i>Ruminococcaceae UCG 005</i>             | 373.131   | 0.148            | 0.009  | 16.907      | 3.98E-64 | 3.30E-62 |
| Temp. ave. 5 days | <i>Ruminococcaceae UCG 008</i>             | 0.559     | 0.104            | 0.019  | 5.479       | 4.27E-08 | 1.27E-07 |
| Temp. ave. 5 days | <i>Ruminococcaceae UCG 009</i>             | 23.939    | 0.151            | 0.013  | 11.823      | 2.97E-32 | 3.70E-31 |
| Temp. ave. 5 days | <i>Ruminococcaceae UCG 010</i>             | 276.254   | 0.150            | 0.013  | 11.455      | 2.21E-30 | 2.20E-29 |
| Temp. ave. 5 days | <i>Ruminococcaceae UCG 011</i>             | 3.298     | 0.110            | 0.017  | 6.343       | 2.25E-10 | 7.93E-10 |
| Temp. ave. 5 days | <i>Ruminococcaceae UCG 013</i>             | 80.548    | 0.061            | 0.010  | 5.952       | 2.64E-09 | 8.77E-09 |
| Temp. ave. 5 days | <i>Ruminococcaceae UCG 014</i>             | 33.964    | 0.048            | 0.010  | 4.969       | 6.73E-07 | 1.78E-06 |
| Temp. ave. 5 days | <i>Ruminococcaceae uncultured</i>          | 65.302    | 0.164            | 0.010  | 16.411      | 1.60E-60 | 9.96E-59 |
| Temp. ave. 5 days | <i>Ruminococcus 1</i>                      | 17.235    | 0.093            | 0.008  | 11.305      | 1.24E-29 | 1.14E-28 |
| Temp. ave. 5 days | <i>Ruminococcus 2</i>                      | 3.113     | 0.112            | 0.015  | 7.675       | 1.65E-14 | 7.23E-14 |
| Temp. ave. 5 days | <i>Saccharofermentans</i>                  | 0.711     | 0.171            | 0.032  | 5.304       | 1.14E-07 | 3.22E-07 |
| Temp. ave. 5 days | <i>Solibacillus</i>                        | 1.616     | 0.470            | 0.074  | 6.321       | 2.60E-10 | 9.01E-10 |
| Temp. ave. 5 days | <i>Sphaerochaeta</i>                       | 0.534     | 0.143            | 0.026  | 5.583       | 2.36E-08 | 7.08E-08 |
| Temp. ave. 5 days | <i>Spirochaetaceae</i>                     | 38.677    | -0.087           | 0.015  | -5.738      | 9.57E-09 | 2.34E-08 |
| Temp. ave. 5 days | <i>Spirochaetes</i>                        | 39.978    | -0.106           | 0.015  | -6.891      | 5.55E-12 | 2.78E-11 |
| Temp. ave. 5 days | <i>Subdoligranulum</i>                     | 1.680     | -0.256           | 0.022  | -11.442     | 2.58E-30 | 2.47E-29 |
| Temp. ave. 5 days | <i>Succinivibrio</i>                       | 6.431     | -0.132           | 0.025  | -5.214      | 1.84E-07 | 5.10E-07 |
| Temp. ave. 5 days | <i>Succinivibrionaceae</i>                 | 19.125    | -0.145           | 0.021  | -6.811      | 9.67E-12 | 2.90E-11 |
| Temp. ave. 5 days | <i>Sutterella</i>                          | 1.566     | -0.290           | 0.025  | -11.484     | 1.59E-30 | 1.65E-29 |
| Temp. ave. 5 days | <i>Tannerellaceae</i>                      | 11.853    | -0.245           | 0.016  | -15.034     | 4.39E-51 | 1.45E-49 |
| Temp. ave. 5 days | <i>Treponema 2</i>                         | 36.316    | -0.067           | 0.016  | -4.240      | 2.23E-05 | 5.24E-05 |
| Temp. ave. 5 days | <i>Turicibacter</i>                        | 3.409     | -0.151           | 0.020  | -7.720      | 1.17E-14 | 5.18E-14 |
| Temp. ave. 5 days | <i>Tyzzerella 4</i>                        | 11.143    | 0.057            | 0.010  | 5.743       | 9.31E-09 | 2.90E-08 |
| Temp. ave. 5 days | <i>Verrucomicrobia</i>                     | 2.847     | 0.116            | 0.019  | 6.061       | 1.35E-09 | 5.42E-09 |
| Temp. ave. 5 days | <i>Victivallaceae</i>                      | 1.662     | 0.200            | 0.028  | 7.059       | 1.67E-12 | 5.26E-12 |
| Temp. ave. 5 days | <i>Victivallaceae uncultured</i>           | 1.739     | 0.297            | 0.033  | 8.977       | 2.79E-19 | 1.58E-18 |
| Temp. ave. 5 days | <i>WCHB1 41 uncultured</i>                 | 0.635     | 0.076            | 0.032  | 2.396       | 1.66E-02 | 2.88E-02 |
| Temp. ave. 5 days | <i>WCHB1 41 uncultured uncultured</i>      | 0.883     | 0.123            | 0.034  | 3.628       | 2.86E-04 | 6.35E-04 |
| Temp. ave. 5 days | <i>Anaerorhabdus furcosa group</i>         | 3.852     | 0.162            | 0.013  | 12.808      | 1.49E-37 | 3.09E-36 |
| Temp. ave. 5 days | <i>Eubacterium brachy group</i>            | 1.357     | 0.138            | 0.017  | 8.144       | 3.83E-16 | 1.91E-15 |
| Temp. ave. 5 days | <i>Eubacterium coprostanoligenes group</i> | 124.788   | 0.088            | 0.010  | 8.801       | 1.36E-18 | 7.35E-18 |
| Temp. ave. 5 days | <i>Eubacterium eligens group</i>           | 0.384     | 0.170            | 0.029  | 5.945       | 2.77E-09 | 9.07E-09 |
| Temp. ave. 5 days | <i>Eubacterium nodatum group</i>           | 1.953     | 0.194            | 0.016  | 11.889      | 1.34E-32 | 1.76E-31 |
| Temp. ave. 5 days | <i>Eubacterium oxidoreducens group</i>     | 6.591     | 0.106            | 0.010  | 10.217      | 1.67E-24 | 1.30E-23 |
| Temp. ave. 5 days | <i>Eubacterium ruminantium group</i>       | 2.313     | 0.060            | 0.018  | 3.370       | 7.53E-04 | 1.62E-03 |
| Temp. ave. 5 days | <i>Eubacterium ventriosum group</i>        | 0.274     | -0.074           | 0.034  | -2.160      | 3.08E-02 | 5.55E-02 |
| Temp. ave. 5 days | <i>Ruminococcus torques group</i>          | 1.263     | -0.111           | 0.017  | -6.423      | 1.34E-10 | 4.82E-10 |
| Temp. ave. 5 days | <i>X28 4</i>                               | 0.345     | 0.076            | 0.031  | 2.464       | 1.37E-02 | 2.63E-02 |
